# Supplementary material for: Genome Analysis of Thinopyrum intermedium and Its Potential Progenitor Species Using Oligo-FISH
Source: MDPI journal article supplement (doi:10.3390/plants12213705), 2023-10-27
Supplement: s1 [file s1]

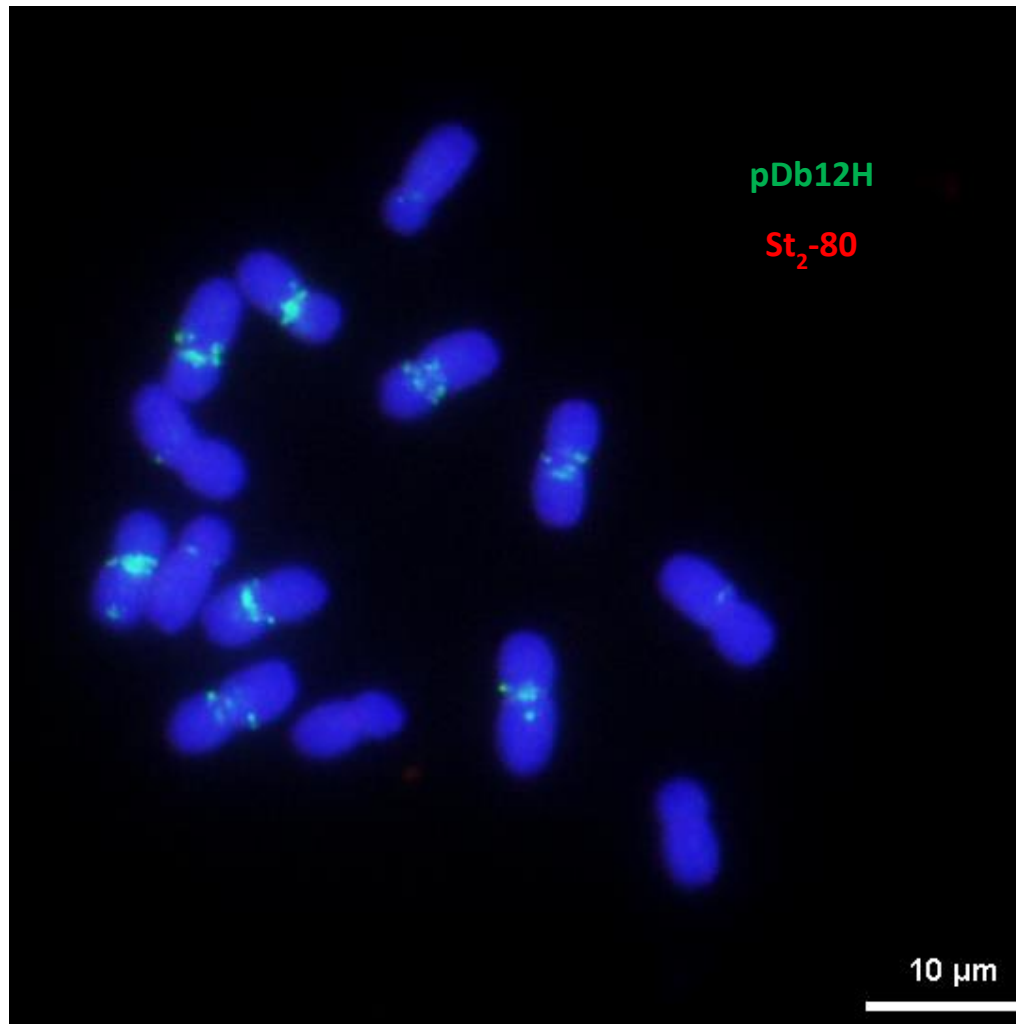

Supplementary Figure S1. Oligonucleotide florescence *in situ* hybridization of chromosomes in *Dasypyrum villosum*. Probes are pDb12H (green) and St<sub>2</sub>-80 (red).
